# Supplementary material
Source: PubMed Central journal article supplement (PMC3000967)

# INDIVIDUAL LYSINE ACETYLATIONS ON THE N-TERMINUS OF *S. CEREVISIAE* H2A.Z ARE HIGHLY BUT NOT DIFFERENTIALLY REGULATED

Monika Mehta<sup>1</sup>, Hannes Braberg<sup>2,3</sup>, Shuyi Wang<sup>2,3</sup>, Anita Lozsa<sup>4</sup>, Michael Shales<sup>2,3</sup>, Alejandra Solache<sup>4</sup>, Nevan J. Krogan<sup>2,3</sup> & Michael-Christopher Keogh<sup>1</sup>

<sup>1</sup> Dept of Cell Biology, Albert Einstein College of Medicine, New York, USA

<sup>2</sup> Dept of Cellular and Molecular Pharmacology, UCSF, San Francisco, USA

<sup>3</sup> California Institute for Quantitative Biomedical Research, UCSF, San Francisco, USA

<sup>4</sup> Millipore Corporation, Temecula, California, USA

**Running Title:** Differential analysis of *S. cerevisiae* H2A.Z acetylation

Address correspondence to: Dr Michael-Christopher Keogh PhD, Chanin 415A, Dept of Cell Biology, 1300 Morris Park Avenue, Bronx NY 10461. Tel: 718 430 8796. Fax: 718 430 8574.

Email: [michael.keogh@einstein.yu.edu](mailto:michael.keogh@einstein.yu.edu)

## SUPPLEMENTARY TABLES / FIGURE LEGENDS

|                       |                                                                  |
|-----------------------|------------------------------------------------------------------|
| <b>Suppl. Table 1</b> | Antibodies used in this study                                    |
| <b>Suppl. Table 2</b> | Strains used in this study                                       |
| <b>Suppl. Table 3</b> | Mutants screened for differential regulation of Htz1 acetylation |

### **Suppl. Fig. 1** *The generation of Htz1<sup>Ac</sup>-specific antibodies*

(A)  $\alpha$ Htz1-K8<sup>Ac</sup> sera from rabbit 10818, or (B)  $\alpha$ Htz1-K10<sup>Ac</sup> sera from rabbit 10808, were tested against a comprehensive peptide panel (sample shown) in Luminex assays. PB, Pre-Bleed; RMF, Relative Mean Fluorescence.

### **Suppl. Fig. 2** *The acetylation of individual Htz1 N-terminal lysines is not interdependent*

Whole cell extracts from the indicated strains were immunoblotted as indicated. As an example *K8R* is the specific mutation of lysine 8 to arginine, while *K8Ac\** is the mutation of all lysines other than K8 (i.e. *K3R*, *K10R*, *K14R*). WT, wild type;  $\Delta$  is *htz1* $\Delta$ . Rpn8 is a loading control.

### **Suppl. Fig. 3** *The acetylation status of Htz1 does not regulate association of the variant with chromatin*

Htz1 acetylation is abolished in *4KR* or *4KQ* and increased in *hda1* $\Delta$  cells. (A - B) Indicated strains were spheroblasted (Total), fractionated into Cytoplasm, Nucleus and Chromatin, and immunoblotted as indicated.  $\alpha$ HA monitors the localization of *htz1.HA<sub>3</sub>*. Appropriate segregation of histone H2B and Rpn8 indicate efficient fractionation: the former is primarily localized in insoluble chromatin, the latter in soluble cytoplasm.

### **Suppl. Fig. 4** *Genetic interactions show that [htz1-N $\Delta$ $\approx$ htz1-4KR] $\neq$ htz1 $\Delta$*

(A) Gene Ontology (GO) categories for the synthetic sick / synthetic lethal (SS/SL) interactors of *htz1* $\Delta$ , *N $\Delta$*  or *4KR*. This highlights the relative similarity between these mutants: i.e. the latter two are most closely related. Numbers in the center of each group indicate their respective SS/SL interactors identified. Note that *N $\Delta$*  and *4KR* were mated to the non-essential deletion and DAmP collections, while *htz1* $\Delta$  was only mated to the former (hence the reduced number of interactors identified). Each map was generated with the OSPREY network visualization system (1). (B) The top hits for over-represented GO functional categories within the SS/SL interactors of *htz1* $\Delta$ , *4KR*, or *N $\Delta$* . Each list was generated with [GOstat](#), which considers and ranks the GO terms contained in the data (2). The precise SS/SL interrogation group differs from the Osprey list (e.g. *htz1* $\Delta$ : 269 or 272 interactors) as the gene space used by each program varies slightly.

**Suppl. Fig. 5** *Efficient Htz1<sup>Ac</sup> does not require individual Asf1-dependent acetylations on histones H3 or H4*

(A - B) WCEs from the indicated unacetylatable histone H3 or H4 point mutants (from the SHIMA collection (3)) were immunoblotted as indicated. H4-K12<sup>Ac</sup> and Rpn8 are controls.

**Suppl. Fig. 6** *Htz1<sup>Ac</sup> is required for resistance to TBZ but not to Camptothecin*

(A) Growth curves on rich non-selective media (YPD) were analyzed on a Bioscreen (see Experimental Procedures). A\*: Boxed area (from A) is re-plotted to facilitate comparison across strains. (B - C) *htz1Δ* shows a mild sensitivity to the topoisomerase inhibitor camptothecin (CPT) on plates (Fig. 5A) but not in liquid culture. Growth curves on YPD containing CPT (μM as indicated) were analyzed on a Bioscreen. C\*: Boxed area (from C) is re-plotted to facilitate comparison across strains. (D - E) *htz1Δ*, and to a lesser degree *NA*, *4KR* or *4KQ*, are sensitive to the microtubule inhibitor TBZ. Growth curves on YPD containing TBZ (μg/ml as indicated) were analyzed on a Bioscreen. E\*: Boxed area (from E) is re-plotted to facilitate comparison across strains.

**Suppl. Fig. 7** *Htz1<sup>Ac</sup> is regulated by benomyl via the Hda1 deacetylase complex*

(A) The reduction of Htz1<sup>Ac</sup> on benomyl treatment is dependent on all members of the Hda1-complex. Strains were grown in YPD to OD<sub>600</sub> ~ 0.5 and benomyl (BEN; μg/ml) added. WCEs were harvested and immunoblotted as indicated. Rpn8 is a loading control. WT, Wild type. (B) Benomyl has no impact on the abundance of Hda1, Hda2 or Hda3. Strains containing C-terminally TAP-tagged forms were grown in YPD to OD<sub>600</sub> ~ 0.5 and benomyl (BEN; μg/ml) added for two hours. WCEs were immunoblotted and probed as indicated. PAP is Peroxidase anti-peroxidase to detect the immunoglobulin component of the TAP tag. Rpn8 is a loading control. (C) Hda1-complex subunits show no mobility shift (which could indicate post-translational modifications such as ubiquitylation or phosphorylation) after treatment of cells with benomyl (B; 40μg/ml) or MMS (M; 0.05%). Gels in the PAP panel were run for significantly longer than those in B to increase resolution. Rpn8 is a loading control. U, untreated.

**Suppl. Fig. 8** *Htz1<sup>Ac</sup> levels are unaffected by 6AU or MPA treatment*

URA<sup>+</sup> wild type cells were grown in synthetic complete medium (lacking uracil) to OD<sub>600</sub> ~ 0.5 and 6-azauracil (6AU) or mycophenolic acid (MPA) added at concentration indicated before growth for another two hours. WCEs were harvested and immunoblotted as indicated. Rpn8 is a loading control. U, Untreated.

**Supplementary Table 1: Antibodies used in this study**

| <b>Anti-</b>                        | <b>Species</b> | <b>Info</b> | <b>Sera #</b> | <b>Source</b>   |
|-------------------------------------|----------------|-------------|---------------|-----------------|
| Histone H2B                         | Rabbit         | Polyclonal  | 39237         | Active Motif    |
| Histone H3-K9 <sup>Ac</sup>         | Rabbit         | Polyclonal  | 39137         | Active Motif    |
| Histone H3-K27 <sup>Ac</sup>        | Rabbit         | Polyclonal  | 39135         | Active Motif    |
| Histone H4-K12 <sup>Ac</sup>        | Rabbit         | Polyclonal  | 39165         | Active Motif    |
| Htz1-K8 <sup>Ac</sup>               | Rabbit         | Polyclonal  | 07-770        | Millipore       |
| Htz1-K10 <sup>Ac</sup>              | Rabbit         | Polyclonal  | 07-771        | Millipore       |
| Htz1-K14 <sup>Ac</sup>              | Rabbit         | Polyclonal  | 07-719        | Millipore (4)   |
| Peroxidase anti-Peroxidase<br>(PAP) | Rabbit         | Polyclonal  | P1291         | Sigma           |
| HA epitope tag                      | Mouse          | Monoclonal  | 12CA5         | -               |
| Rpn8 (YOR261C)                      | Rabbit         | Polyclonal  | sera4797      | Dan Finley, HMS |

**Supplementary Table 2: Yeast strains used in this study**

| Name    | Alt. name     | Genotype                                                                                                                                                                                                                                                                            | Used *     | Ref.            |
|---------|---------------|-------------------------------------------------------------------------------------------------------------------------------------------------------------------------------------------------------------------------------------------------------------------------------------|------------|-----------------|
| KFY351  | YSB1583       | MAT $\alpha$ <i>ura3<math>\Delta</math>0 leu2<math>\Delta</math>0 his3<math>\Delta</math>1 met15<math>\Delta</math>0 trp1<math>\Delta</math>::HIS3</i>                                                                                                                              | Throughout | Buratowski Lab  |
| KFY471  | BY4741        | MAT $\alpha$ <i>ura3<math>\Delta</math>0 leu2<math>\Delta</math>0 his3<math>\Delta</math>1 met15<math>\Delta</math>0</i>                                                                                                                                                            | Throughout | Open Biosystems |
| KFY472  | Y3656, YF1109 | MAT $\alpha$ <i>ura3<math>\Delta</math>0 leu2<math>\Delta</math>0 his3<math>\Delta</math>1 met15<math>\Delta</math>0 lys2<math>\Delta</math>0 can1<math>\Delta</math>::MFA1<math>\rho</math>-HIS3-MF<math>\alpha</math>1<math>\rho</math>-LEU2</i>                                  | Throughout | (5)             |
| KFY1069 | YMS196        | MAT $\alpha$ <i>ura3<math>\Delta</math>0 leu2<math>\Delta</math>0 his3<math>\Delta</math>1 met15<math>\Delta</math>0 lys2<math>\Delta</math>0 LYS2+ can1<math>\Delta</math>::STE2<math>\rho</math>-Sp.his5<sup>+</sup> lyp1<math>\Delta</math>::STE3<math>\rho</math>-LEU2 cyh2</i> | Throughout | (6)             |
| KFY1129 |               | KFY471 <i>hda1<math>\Delta</math>::Kan.MX</i>                                                                                                                                                                                                                                       | ST3        | Open Biosystems |
| KLY391  |               | KLY34 <i>hda1<math>\Delta</math>::Kan.MX</i>                                                                                                                                                                                                                                        | F1F, F6    | This work       |
| KFY1391 |               | KFY471 <i>hda2<math>\Delta</math>::Kan.MX</i>                                                                                                                                                                                                                                       | ST3, SF7A  | Open Biosystems |
| KFY1125 |               | KFY471 <i>hda3<math>\Delta</math>::Kan.MX</i>                                                                                                                                                                                                                                       | ST3, SF7A  | Open Biosystems |
| KFY1513 |               | KFY471 <i>HDA1.TAP::HIS3.MX</i>                                                                                                                                                                                                                                                     | SF7B-C     | (7)             |
| KFY1514 |               | KFY471 <i>HDA2.TAP::HIS3.MX</i>                                                                                                                                                                                                                                                     | SF7B-C     | (7)             |
| KFY1515 |               | KFY471 <i>HDA3.TAP::HIS3.MX</i>                                                                                                                                                                                                                                                     | SF7B-C     | (7)             |
| KFY662  | AT17          | KFY472 <i>set3<math>\Delta</math>::Kan.MX</i>                                                                                                                                                                                                                                       | ST3        | Greenblatt lab  |
| KFY689  | AT53          | KFY472 <i>hst1<math>\Delta</math>::Kan.MX</i>                                                                                                                                                                                                                                       | ST3        | Greenblatt lab  |
| KFY695  | AT61          | KFY472 <i>hos2<math>\Delta</math>::Kan.MX</i>                                                                                                                                                                                                                                       | ST3        | Greenblatt lab  |
| KFY701  | AT69          | KFY472 <i>sap30<math>\Delta</math>::Nat.MX</i>                                                                                                                                                                                                                                      | ST3        | Greenblatt lab  |
| KFY699  | AT66          | KFY472 <i>rxt2<math>\Delta</math>::Nat.MX</i>                                                                                                                                                                                                                                       | ST3        | Greenblatt lab  |
| KFY705  | AT74          | KFY472 <i>pho23<math>\Delta</math>::Nat.MX</i>                                                                                                                                                                                                                                      | ST3        | Greenblatt lab  |
| KFY704  | AT73          | KFY472 <i>ume1<math>\Delta</math>::Nat.MX</i>                                                                                                                                                                                                                                       | ST3        | Greenblatt lab  |
| KFY431  |               | KFY471 <i>rpd3<math>\Delta</math>::Kan.MX</i>                                                                                                                                                                                                                                       | ST3        | Open Biosystems |
| KFY871  | AT357         | KFY472 <i>rpd3<math>\Delta</math>::Nat.MX</i>                                                                                                                                                                                                                                       | ST3        | Greenblatt lab  |
| KFY1368 |               | KFY471 <i>sin3<math>\Delta</math>::Kan.MX</i>                                                                                                                                                                                                                                       | ST3        | Open Biosystems |
| KFY879  | AT352         | KFY472 <i>sin3<math>\Delta</math>::Nat.MX</i>                                                                                                                                                                                                                                       | ST3        | Greenblatt lab  |
| KFY598  |               | KFY471 <i>eaf3<math>\Delta</math>::Kan.MX</i>                                                                                                                                                                                                                                       | ST3        | Open Biosystems |
| KFY800  | AT243         | KFY472 <i>eaf3<math>\Delta</math>::Nat.MX</i>                                                                                                                                                                                                                                       | ST3        | Greenblatt lab  |
| KFY432  |               | KFY471 <i>rco1<math>\Delta</math>::Kan.MX</i>                                                                                                                                                                                                                                       | ST3        | Open Biosystems |
| KFY841  | AT321         | KFY472 <i>rco1<math>\Delta</math>::Nat.MX</i>                                                                                                                                                                                                                                       | ST3        | Greenblatt lab  |
| KFY1072 |               | KFY471 <i>sir2<math>\Delta</math>::Kan.MX</i>                                                                                                                                                                                                                                       | ST3        | Open Biosystems |
| KFY908  | AT409         | KFY472 <i>hos3<math>\Delta</math>::Nat.MX</i>                                                                                                                                                                                                                                       | ST3        | Greenblatt lab  |
| KFY867  | AT352         | KFY472 <i>hos1<math>\Delta</math>::Nat.MX</i>                                                                                                                                                                                                                                       | ST3        | Greenblatt lab  |
| KFY681  | AT43          | KFY472 <i>eaf1<math>\Delta</math> (vid21<math>\Delta</math>)::Nat.MX</i>                                                                                                                                                                                                            | ST3, F1E   | Greenblatt lab  |
| KFY392  |               | KFY471 <i>eaf1<math>\Delta</math> (vid21<math>\Delta</math>)::Kan.MX</i>                                                                                                                                                                                                            | ST3        | Open Biosystems |
| KFY476  | YF1115        | KFY472 <i>yng2<math>\Delta</math>::Nat.MX</i>                                                                                                                                                                                                                                       | ST3, F1E   | Greenblatt lab  |
| KFY799  | AT242         | KFY472 <i>yaf9<math>\Delta</math>::Nat.MX</i>                                                                                                                                                                                                                                       | ST3, F1E   | Greenblatt lab  |

| Name    | Alt. name | Genotype                                                                                                                       | Used *            | Ref.            |
|---------|-----------|--------------------------------------------------------------------------------------------------------------------------------|-------------------|-----------------|
| KFY391  | YSB1758   | MATa <i>ura3Δ0 leu2Δ0 his3Δ1 met15Δ0 trp1Δ::URA3 yaf9Δ::Kan.MX</i>                                                             | ST3               | Buratowski lab  |
| KFY712  | AT87      | KFY472 <i>swc2Δ (vps72Δ)::Nat.MX</i>                                                                                           | ST3               | Greenblatt lab  |
| KFY356  | YSB1599   | MATa <i>ura3Δ0 leu2Δ0 his3Δ1 met15Δ0 trp1Δ::HIS3 swc2Δ::Kan.MX</i>                                                             | ST3               | Buratowski lab  |
| KFY357  | YSB1610   | KFY351 <i>swc6Δ (vps71Δ)::Kan.MX HTZ1.HA<sub>3</sub>.KI-TRP</i>                                                                | ST3               | Buratowski lab  |
| KFY1140 |           | KFY471 <i>swr1Δ::Kan.MX</i>                                                                                                    | ST3, F1D          | Open Biosystems |
| KFY589  | YF526     | KFY471 <i>htz1Δ::Kan.MX</i>                                                                                                    |                   | (8)             |
| KFY628  | NJK1172   | KFY472 <i>htz1Δ::Nat.MX</i>                                                                                                    | F1E               | (9)             |
| KLY36   |           | MATα <i>ura3Δ0 leu2Δ0 his3Δ1 met15Δ0 htz1Δ::Nat.MX</i>                                                                         | F1D, SF2          | This work       |
| KLY400  |           | KLY34 <i>Nat.NT2-GAL1<sub>p</sub>-HTZ1.HA<sub>3</sub>.KI-TRP</i>                                                               | F3B-C             | This work       |
| KLY726  |           | KLY400 <i>hda1Δ::Kan.MX</i>                                                                                                    | F3C               | This work       |
| KLY727  |           | KLY34 <i>Nat.NT2-GAL1<sub>p</sub>-htz1-4KR.HA<sub>3</sub>.KI-TRP</i>                                                           | F3C               | This work       |
| KFY582  | LPY3498   | MATa <i>ura3-52 leu2-3,112 trp1Δ1 his3Δ200</i>                                                                                 | F1D               | (10)            |
| KFY583  | LPY4345   | KFY582 <i>esa1-L327S +/- [pLP795: ESA1, URA3, CEN/ARS]</i>                                                                     | F1D <sup>NS</sup> | (10)            |
| KFY584  | LPY4346   | KFY582 <i>esa1-L254P +/- [pLP795: ESA1, URA3, CEN/ARS]</i>                                                                     | F1D               | (10)            |
| KFY585  | LPY4346   | KFY582 <i>esa1Δ414 +/- [pLP795: ESA1, URA3, CEN/ARS]</i>                                                                       | F1D <sup>NS</sup> | (10)            |
| KFY1136 |           | KFY471 <i>gcn5Δ::Kan.MX</i>                                                                                                    | F1D               | Open Biosystems |
| KFY935  | AT461     | KFY472 <i>sgf73Δ::Nat.MX</i>                                                                                                   | ST3               | Greenblatt lab  |
| KFY602  |           | KFY471 <i>sas3Δ::Kan.MX</i>                                                                                                    | ST3               | Open Biosystems |
| KFY910  | AT411     | KFY472 <i>sas3Δ::Nat.MX</i>                                                                                                    | ST3               | Greenblatt lab  |
| KFY635  |           | KFY471 <i>sas2Δ::Kan.MX</i>                                                                                                    | ST3               | Open Biosystems |
| KFY913  | AT415     | KFY472 <i>sas2Δ::Nat.MX</i>                                                                                                    | ST3               | Greenblatt lab  |
| KFY634  |           | KFY471 <i>hat1Δ::Kan.MX</i>                                                                                                    | ST3               | Open Biosystems |
| KFY929  | AT441     | KFY472 <i>hat2Δ::Nat.MX</i>                                                                                                    | ST3               | Greenblatt lab  |
| KFY1392 |           | KFY471 <i>hpa2Δ::Kan.MX</i>                                                                                                    | ST3               | Open Biosystems |
| KFY1135 |           | KFY471 <i>rtt109Δ::Kan.MX</i>                                                                                                  | ST3               | Open Biosystems |
| KFY900  | AT398     | KFY472 <i>rtt109Δ::Nat.MX</i>                                                                                                  | ST3               | Greenblatt lab  |
| KFY1138 |           | KFY471 <i>vps75Δ::Kan.MX</i>                                                                                                   | ST3               | Open Biosystems |
| KFY1010 | AT678     | KFY472 <i>vps75Δ::Nat.MX</i>                                                                                                   | ST3               | Greenblatt lab  |
| KFY1137 |           | KFY471 <i>asf1Δ::Kan.MX</i>                                                                                                    | ST3               | Open Biosystems |
| KFY742  | AT131     | KFY472 <i>asf1Δ::Nat.MX</i>                                                                                                    | ST3               | Greenblatt lab  |
| KLY396  |           | KLY34 <i>asf1Δ::Kan.MX</i>                                                                                                     | F4A-B             | This work       |
| KFY1438 | SRH001    | MATa <i>ura3-1 leu2-3,112 trp1-1 his3-11 lys2Δ can1-100 TELVIII::URA3 bar1Δ::LEU2 Kan.MX6-GAL1<sub>p</sub>-3HA-ASF1</i>        | F4D-E             | (11)            |
| KFY1439 | SRH014    | MATa <i>ura3-1 leu2-3,112 trp1-1 his3-11 lys2Δ can1-100 gal1::hisG bar1Δ::LEU2 Kan.MX6-GAL1<sub>p</sub>-ASF1-3HA-PEST-HIS3</i> | F4D-E             | (11)            |
| KFY498  | FY2162,   | MATa <i>ura3-52 leu2Δ1 trp1Δ63 his3Δ200 lys2-126δ Ty912Δ35-LacZ::his4</i>                                                      | SF5A-B            | (12)            |

| Name    | Alt. name | Genotype                                                                      | Used *                   | Ref.            |
|---------|-----------|-------------------------------------------------------------------------------|--------------------------|-----------------|
|         | YBL574    | <i>[hht1-hhf1]Δ::LEU2 [hht2-hhf2]Δ::HIS3 [pDM9: HHT1-HHF1, URA3, CEN/ARS]</i> |                          |                 |
| KFY1379 |           | KFY498 [pDM9 shuffled] + [hht2-K9A, HHF1, TRP1, CEN/ARS]                      | SF5A                     | (3)             |
| KFY1380 |           | KFY498 [pDM9 shuffled] + [hht2-K27A, HHF1, TRP1, CEN/ARS]                     | SF5A                     | (3)             |
| KFY1382 |           | KFY498 [pDM9 shuffled] + [hht2-K56A, HHF1, TRP1, CEN/ARS]                     | SF5A                     | (3)             |
| KFY1384 |           | KFY498 [pDM9 shuffled] + [HHT2, hhf1-K5A, TRP1, CEN/ARS]                      | SF5B                     | (3)             |
| KFY1385 |           | KFY498 [pDM9 shuffled] + [HHT2, hhf1-K8A, TRP1, CEN/ARS]                      | SF5B                     | (3)             |
| KFY1386 |           | KFY498 [pDM9 shuffled] + [HHT2, hhf1-K12A, TRP1, CEN/ARS]                     | SF5B                     | (3)             |
| KFY590  |           | KFY471 <i>elp1Δ::Kan.MX</i>                                                   | ST3                      | Open Biosystems |
| KFY837  | AT315     | KFY472 <i>elp2Δ::Nat.MX</i>                                                   | ST3                      | Greenblatt lab  |
| KFY591  |           | KFY471 <i>elp3Δ::Kan.MX</i>                                                   | ST3                      | Open Biosystems |
| KFY720  | AT101     | KFY472 <i>elp3Δ::Nat.MX</i>                                                   | ST3                      | Greenblatt lab  |
| KFY734  | AT121     | KFY472 <i>elp4Δ::Nat.MX</i>                                                   | ST3                      | Greenblatt lab  |
| KFY732  | AT118     | KFY472 <i>elp6Δ::Nat.MX</i>                                                   | ST3                      | Greenblatt lab  |
| KFY1314 |           | KFY471 <i>hir1Δ::Kan.MX</i>                                                   | ST3                      | Open Biosystems |
| KFY1315 |           | KFY471 <i>hir2Δ::Kan.MX</i>                                                   | ST3                      | Open Biosystems |
| KFY1510 |           | KFY471 <i>hir3Δ::Kan.MX</i>                                                   | ST3                      | Open Biosystems |
| KFY1471 |           | KFY471 <i>rtt106Δ::Kan.MX</i>                                                 | ST3                      | Open Biosystems |
| KLY66   |           | KFY471 <i>spe1Δ::Kan.MX</i>                                                   | ST3                      | This work       |
| KLY67   |           | KFY471 <i>spe2Δ::Kan.MX</i>                                                   | ST3                      | This work       |
| KLY81   |           | KFY471 <i>spe3Δ::Kan.MX</i>                                                   | ST3                      | This work       |
| KLY68   |           | KFY471 <i>spe4Δ::Kan.MX</i>                                                   | ST3                      | This work       |
| KLY34   |           | KFY351 <i>HTZ1.HA<sub>3</sub>.KI-TRP</i>                                      | Throughout               | This work       |
| KFY358  |           | KLY34 <i>swr1Δ::Kan.MX</i>                                                    | ST3, F1C                 | (4)             |
| KLY270  |           | KLY34 <i>pho85Δ::Nat.MX</i>                                                   | ST3                      | This work       |
| KLY269  |           | KLY34 <i>ado1Δ::Nat.MX</i>                                                    | ST3                      | This work       |
| KLY289  |           | KLY34 <i>bem1Δ::Kan.MX</i>                                                    | ST3                      | This work       |
| KLY268  |           | KLY34 <i>rts1Δ::Nat.MX</i>                                                    | ST3                      | This work       |
| KLY299  |           | KLY34 <i>pho13Δ::Kan.MX</i>                                                   | ST3                      | This work       |
| KLY20   |           | KFY1069 <i>htz1Δ::Nat.MX</i>                                                  | F2, F5, SF4,<br>SF6, SF8 | This work       |
| KLY185  |           | KFY1069 <i>htz1-K3R</i>                                                       | SF2                      | This work       |
| KLY186  |           | KFY1069 <i>htz1-K8R</i>                                                       | SF2                      | This work       |
| KLY187  |           | KFY1069 <i>htz1-K10R</i>                                                      | SF2                      | This work       |
| KLY192  |           | KFY1069 <i>htz1-K14R</i>                                                      | SF2, SF6                 | This work       |
| KLY188  |           | KFY1069 <i>htz1-K14Q</i>                                                      | SF2, SF6                 | This work       |
| KLY711  |           | KFY1069 <i>htz1-K8R,K10R,K14R</i>                                             | SF2                      | This work       |
| KLY193  |           | KFY1069 <i>htz1-K3R,K10R,K14R</i>                                             | SF2                      | This work       |
| KLY712  |           | KFY1069 <i>htz1-K3R,K8R,K14R</i>                                              | SF2                      | This work       |
| KLY713  |           | KFY1069 <i>htz1-K3R,K8R,K10R</i>                                              | SF2                      | This work       |

| Name   | Alt. name | Genotype                                     | Used *     | Ref.      |
|--------|-----------|----------------------------------------------|------------|-----------|
| KLY229 |           | KFY1069 <i>htz1-4KR</i>                      | Throughout | This work |
| KLY230 |           | KFY1069 <i>htz1-4KQ</i>                      | Throughout | This work |
| KLY28  |           | KFY1069 <i>HTZ1::Nat.NT2</i> (Tracking)      | F2         | This work |
| KLY35  |           | KFY1069 <i>htz1-NΔ::LoxP::Nat.NT2</i>        | F2         | This work |
| KLY262 |           | KFY1069 <i>htz1-4KR::Nat.NT2</i>             | F2         | This work |
| KLY263 |           | KFY1069 <i>htz1-4KQ::Nat.NT2</i>             | F2         | This work |
| KLY231 |           | KFY1069 <i>htz1-K3R::Nat.NT2</i>             | F2         | This work |
| KLY232 |           | KFY1069 <i>htz1-K8R::Nat.NT2</i>             | F2         | This work |
| KLY199 |           | KFY1069 <i>htz1-K10R::Nat.NT2</i>            | F2         | This work |
| KLY233 |           | KFY1069 <i>htz1-K14R::Nat.NT2</i>            | F2         | This work |
| KLY506 |           | KFY1069 <i>htz1-K3Q::Nat.NT2</i>             | F2         | This work |
| KLY507 |           | KFY1069 <i>htz1-K8Q::Nat.NT2</i>             | F2         | This work |
| KLY530 |           | KFY1069 <i>htz1-K10Q::Nat.NT2</i>            | F2         | This work |
| KLY200 |           | KFY1069 <i>htz1-K14Q::Nat.NT2</i>            | F2         | This work |
| KLY717 |           | KFY1069 <i>htz1-K8R, K10R, K14R::Nat.NT2</i> | F2         | This work |
| KLY714 |           | KFY1069 <i>htz1-K3R, K10R, K14R::Nat.NT2</i> | F2         | This work |
| KLY715 |           | KFY1069 <i>htz1-K3R, K8R, K14R::Nat.NT2</i>  | F2         | This work |
| KLY716 |           | KFY1069 <i>htz1-K3R, K8R, K10R::Nat.NT2</i>  | F2         | This work |

\* F1D, Figure 1D (etc); <sup>NS</sup>, not shown; ST3, Supplementary Table 3.

**Supplementary Table 3:** Strains used for proteomic screening to identify novel Htz1<sup>Ac</sup> regulators

| Complex: Activity <sup>a</sup>                                                 | Genes annotated | # Checked              | Specific mutants <sup>b</sup>                                                                                                                               | Effect on Htz1 <sup>Ac</sup>                                                                        |
|--------------------------------------------------------------------------------|-----------------|------------------------|-------------------------------------------------------------------------------------------------------------------------------------------------------------|-----------------------------------------------------------------------------------------------------|
| NuA4: Acetyltransferase                                                        | 13              | Unique: 3<br>Shared: 2 | <i>eaf1, yng2, esa1<sup>c</sup><br/>yaf9, eaf3<sup>d</sup></i>                                                                                              | Strongly reduced <sup>e</sup> (3/3) (e.g. Fig. 1D-E)<br>Reduced <sup>e</sup> (1/2); No change (1/2) |
| SWR-C: Snf2-family ATPase                                                      | 14              | Unique: 3              | <i>swc2, swc6, swr1</i>                                                                                                                                     | Strongly reduced (1/3); Reduced (2/3)                                                               |
| Rpd3L: Deacetylase                                                             | 14              | Unique: 3<br>Shared: 3 | <i>pho23, rxt2, sap30<br/>rpd3, sin3, ume1</i>                                                                                                              | Reduced (3/3)<br>Reduced (3/3)                                                                      |
| Rpd3S: Deacetylase                                                             | 5               | Unique: 2              | <i>rco1, eaf3<sup>d</sup></i>                                                                                                                               | No change (2/2)                                                                                     |
| SAGA: Acetyltransferase                                                        | 20              | Shared: 1              | <i>gcn5, sgf73</i>                                                                                                                                          | No change (2/2) (e.g. Fig. 1D)                                                                      |
| ADA: Acetyltransferase                                                         | 3               | Shared: 1              | <i>gcn5</i>                                                                                                                                                 | No change (1/1)                                                                                     |
| SLIK: Acetyltransferase                                                        | 18              | Shared: 2              | <i>gcn5, sgf73</i>                                                                                                                                          | No change (2/2)                                                                                     |
| HDA1: Deacetylase                                                              | 3               | 3                      | <i>hda1-3</i>                                                                                                                                               | Increased (1/3); No change (2/3) (e.g. Fig. 1F)                                                     |
| Elongator: Acetyltransferase                                                   | 6               | 5                      | <i>elp1-4, elp6</i>                                                                                                                                         | Reduced (5/5)                                                                                       |
| SET3-C: Deacetylase                                                            | 7               | 3                      | <i>set3, hst1, hos2</i>                                                                                                                                     | Reduced (1/3); No change (2/3)                                                                      |
| HIR: Histone chaperone                                                         | 4               | 3                      | <i>hir1-3</i>                                                                                                                                               | Reduced (1/3); No change (2/3)                                                                      |
| NuA3: Acetyltransferase                                                        | 5               | 1                      | <i>sas3</i>                                                                                                                                                 | No change (1/1)                                                                                     |
| SAS: Acetyltransferase                                                         | 3               | 1                      | <i>sas2</i>                                                                                                                                                 | No change (1/1)                                                                                     |
| HAT: Acetyltransferase                                                         | 2               | 2                      | <i>hat1-2</i>                                                                                                                                               | No change (2/2)                                                                                     |
| Miscellaneous (includes acetyltransferases, deacetylases & histone chaperones) |                 | 20                     | <i>ado1, asf1, bem1, H3<sup>f</sup>,<br/>H4<sup>f</sup>, hos1, hos3, hpa2,<br/>pho13, pho85, rts1,<br/>rtt106, rtt109, vps75,<br/>sir2, spe1-4, ydl025c</i> | Reduced (8/20); No change (12/20)<br><br>Asf1 (see Fig. 4)                                          |

<sup>a</sup> Not intended as an exhaustive description of the enzymatic activities in many of these complexes

<sup>b</sup> Deletion unless stated otherwise

<sup>c</sup> Temperature sensitive allele

<sup>d</sup> Eaf3 is a member of the NuA4 acetyltransferase and Rpd3S deacetylase complexes (13)

<sup>e</sup> Strongly reduced is defined as below the level of detection in Western analysis

<sup>f</sup> Histone H3 / H4 point mutants were from the SHIMA collection (see Supplementary Figure 5)



## SUPPLEMENTARY REFERENCES

1. Breitkreutz, B. J., Stark, C., and Tyers, M. (2003) *Genome Biol* **4**, R22
2. Beissbarth, T., and Speed, T. P. (2004) *Bioinformatics* **20**, 1464-1465
3. Nakanishi, S., Sanderson, B. W., Delventhal, K. M., Bradford, W. D., Staehling-Hampton, K., and Shilatifard, A. (2008) *Nat Struct Mol Biol* **15**, 881-888
4. Keogh, M.-C., Mennella, T. A., Sawa, C., Berthelet, S., Krogan, N. J., Wolek, A., Podonly, V., Carpenter, L. R., Greenblatt, J. F., Baetz, K. K., and Buratowski, S. (2006) *Genes Dev* **20**, 660-665
5. Tong, A. H. Y., Evangelista, M., Parsons, A. B., Xu, H., Bader, G. D., Page, N., Robinson, M., Raghibizadeh, S., Hogue, C. W., Bussey, H., Andrews, B., Tyers, M., and Boone, C. (2001) *Science* **294**, 2364-2368
6. Schuldiner, M., Collins, S. R., Weissman, J. S., and Krogan, N. J. (2006) *Methods* **40**, 344-352
7. Ghaemmighami, S., Huh, W. K., Bower, K., Howson, R. W., Belle, A., Dephoure, N., O'Shea, E. K., and Weissman, J. S. (2003) *Nature* **425**, 737-741
8. Krogan, N. J., Keogh, M.-C., Datta, N., Sawa, C., Ryan, O. W., Ding, H., Haw, R. A., Pootoolal, J., Tong, A., Canadien, V., Richards, D. P., Wu, X., Emili, A., Hughes, T. R., Buratowski, S., and Greenblatt, J. F. (2003) *Mol Cell* **12**, 1565-1576
9. Krogan, N. J., Baetz, K., Keogh, M.-C., Datta, N., Sawa, C., Kwok, T. C. Y., Thompson, N. J., Davey, M. G., Pootoolal, J., Hughes, T. R., Emili, A., Buratowski, S., Hieter, P., and Greenblatt, J. F. (2004) *Proc Natl Acad Sci USA* **101**, 15313-15318
10. Clarke, A. S., Lowell, J. E., Jacobson, S. J., and Pillus, L. (1999) *Mol Cell Biol* **19**, 2515-2526
11. Zabaronick, S. R., and Tyler, J. K. (2005) *Mol Cell Biol* **25**, 652-660
12. Duina, A. A., and Winston, F. (2004) *Mol Cell Biol* **24**, 561-572
13. Keogh, M.-C., Kurdistani, S. K., Morris, S. A., Ahn, S. H., Podolny, V., Collins, S. R., Schuldiner, M., Chin, K., Punna, T., Thompson, N. J., Boone, C., Emili, A., Weissman, J. S., Hughes, T. R., Strahl, B. D., Grunstein, M., Greenblatt, J. F., Buratowski, S., and Krogan, N. J. (2005) *Cell* **123**, 593-605

Suppl Fig 1: Mehta *et al*

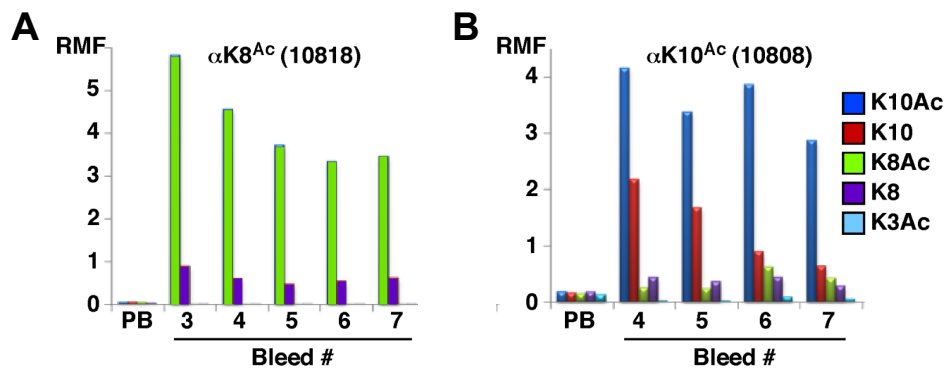

Suppl Fig 2: Mehta *et al*

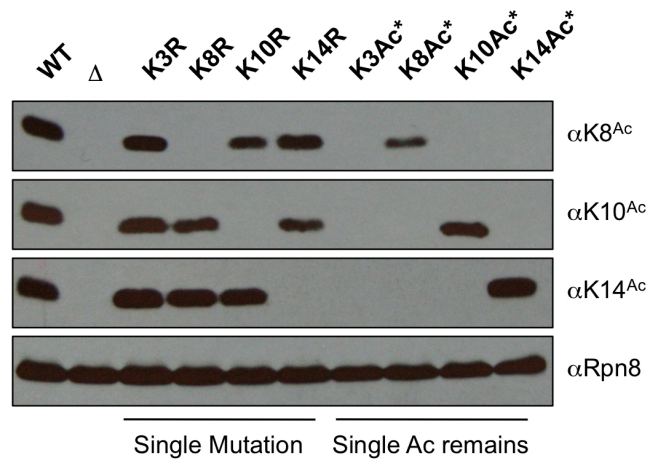

Suppl Fig 3: Mehta *et al*

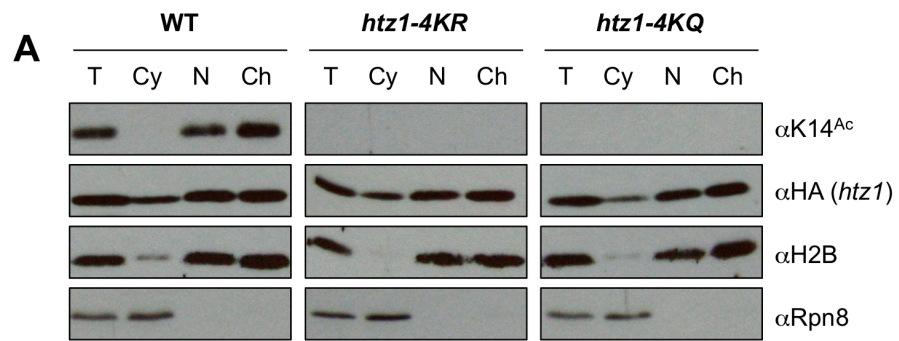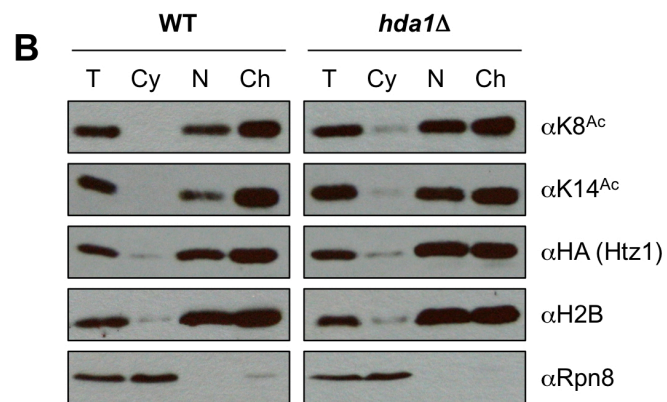

Suppl Fig 4: Mehta *et al*

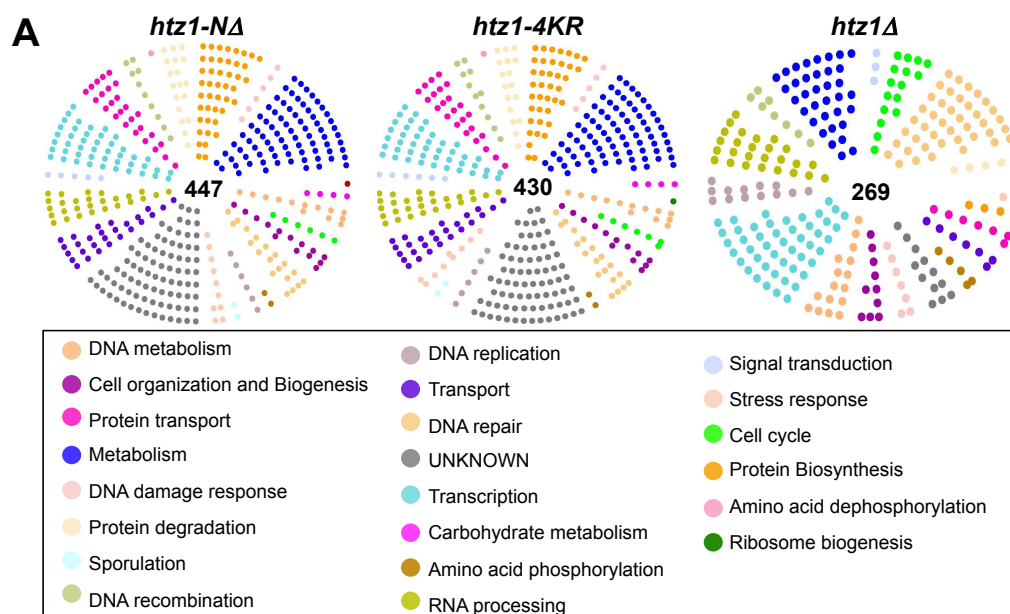

**B**

| <i>htz1</i>                | SS/SL                       | GO term                    | Category                                                 | P-value  |
|----------------------------|-----------------------------|----------------------------|----------------------------------------------------------|----------|
| Δ                          | 272                         | <a href="#">GO:0006325</a> | Establishment &/or maintenance of chromatin architecture | 0        |
|                            |                             | <a href="#">GO:0016568</a> | chromatin modification                                   | 0        |
|                            |                             | <a href="#">GO:0051276</a> | chromosome organization & biogenesis                     | 0        |
|                            |                             | <a href="#">GO:0006323</a> | DNA packaging                                            | 0        |
|                            |                             | <a href="#">GO:0005667</a> | transcription factor complex                             | 1.11E-77 |
|                            |                             | <a href="#">GO:0006351</a> | transcription, DNA-dependent                             | 2.21E-62 |
|                            |                             | <a href="#">GO:0016570</a> | histone modification                                     | 8.84E-54 |
|                            |                             | <a href="#">GO:0006974</a> | response to DNA damage stimulus                          | 2.00E-47 |
|                            |                             | <a href="#">GO:0032200</a> | telomere organization & biogenesis                       | 1.90E-45 |
|                            |                             | <a href="#">GO:0006366</a> | transcription from RNA polymerase II promoter            | 3.83E-43 |
|                            |                             | <a href="#">GO:0006338</a> | chromatin remodeling                                     | 5.79E-35 |
| <a href="#">GO:0045449</a> | regulation of transcription | 6.12E-35                   |                                                          |          |
| 4KR                        | 386                         | <a href="#">GO:0032200</a> | telomere organization and biogenesis                     | 2.39E-45 |
|                            |                             | <a href="#">GO:0051276</a> | chromosome organization and biogenesis                   | 1.43E-43 |
|                            |                             | <a href="#">GO:0016570</a> | histone modification                                     | 1.43E-22 |
|                            |                             | <a href="#">GO:0006351</a> | transcription, DNA dependent                             | 3.86E-20 |
|                            |                             | <a href="#">GO:0016568</a> | chromatin modification                                   | 8.85E-20 |
|                            |                             | <a href="#">GO:0006323</a> | DNA packaging                                            | 1.10E-17 |
|                            |                             | <a href="#">GO:0006366</a> | transcription from RNA polymerase II promoter            | 7.26E-17 |
|                            |                             | <a href="#">GO:0007035</a> | vacuolar acidification                                   | 5.46E-09 |
|                            |                             | <a href="#">GO:0045449</a> | regulation of transcription                              | 1.10E-08 |
|                            |                             | <a href="#">GO:0005667</a> | transcription factor complex                             | 1.71E-08 |
|                            |                             | <a href="#">GO:0006338</a> | chromatin remodelling                                    | 7.89E-08 |
| <a href="#">GO:0006885</a> | regulation of cellular pH   | 8.61E-08                   |                                                          |          |
| NA                         | 398                         | <a href="#">GO:0032200</a> | telomere organization and biogenesis                     | 1.85E-46 |
|                            |                             | <a href="#">GO:0051276</a> | chromosome organization and biogenesis                   | 1.67E-44 |
|                            |                             | <a href="#">GO:0016570</a> | histone modification                                     | 1.08E-21 |
|                            |                             | <a href="#">GO:0016568</a> | chromatin modification                                   | 6.67E-20 |
|                            |                             | <a href="#">GO:0006351</a> | transcription, DNA dep                                   | 1.12E-19 |
|                            |                             | <a href="#">GO:0006323</a> | DNA packaging                                            | 9.94E-18 |
|                            |                             | <a href="#">GO:0006366</a> | transcription from RNA polymerase II promoter            | 8.22E-16 |
|                            |                             | <a href="#">GO:0007034</a> | vacuolar transport                                       | 5.24E-09 |
|                            |                             | <a href="#">GO:0005667</a> | transcription factor complex                             | 6.03E-09 |
|                            |                             | <a href="#">GO:0007035</a> | vacuolar acidification                                   | 7.50E-09 |
|                            |                             | <a href="#">GO:0007033</a> | vacuole organization and biogenesis                      | 7.55E-09 |
| <a href="#">GO:0045449</a> | regulation of transcription | 1.31E-08                   |                                                          |          |

Suppl Fig 5: Mehta *et al*

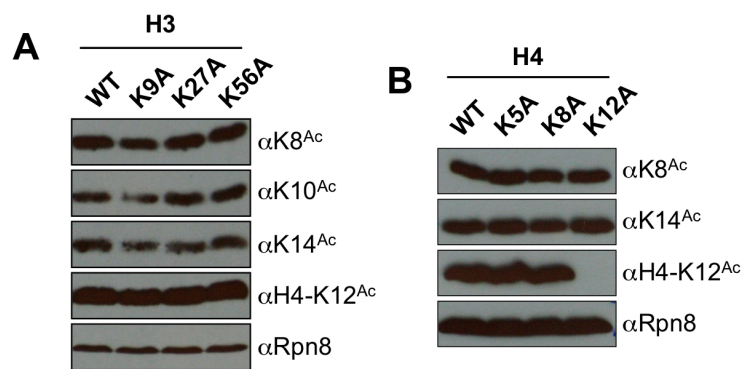

Suppl Fig 6: Mehta *et al*

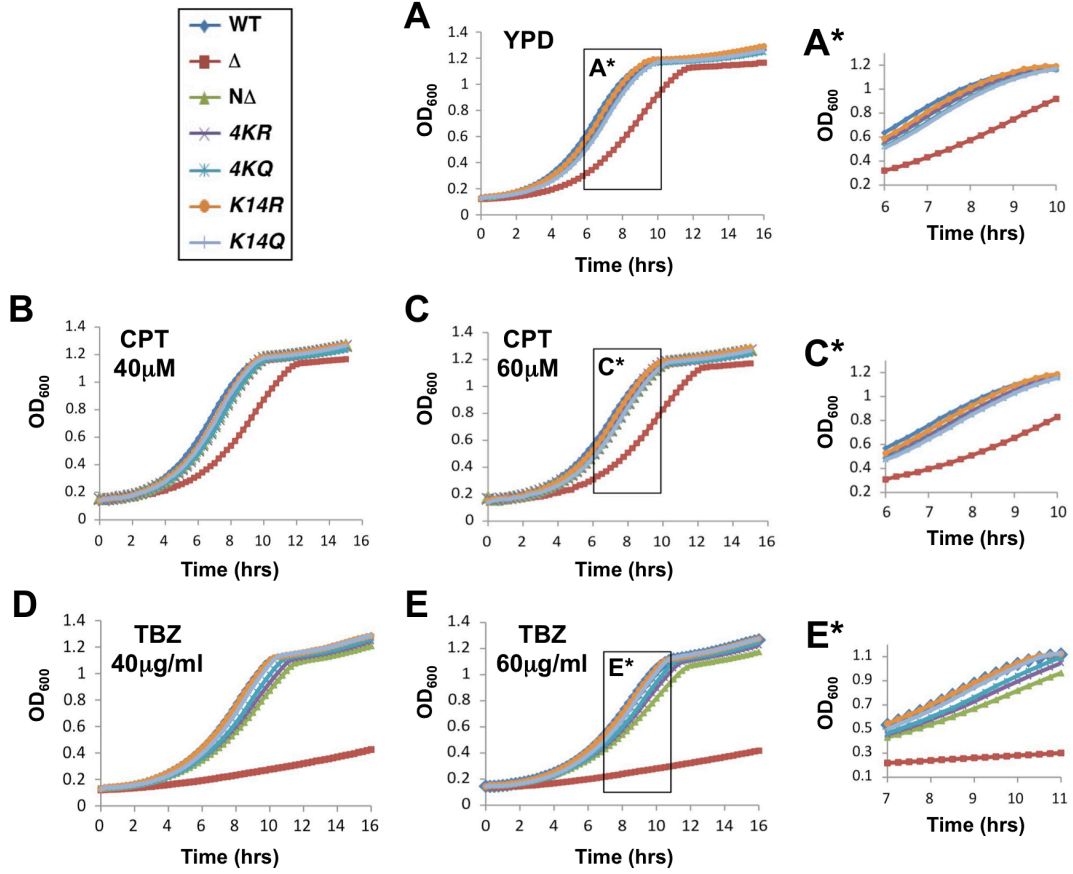

Suppl Fig 7: Mehta *et al*

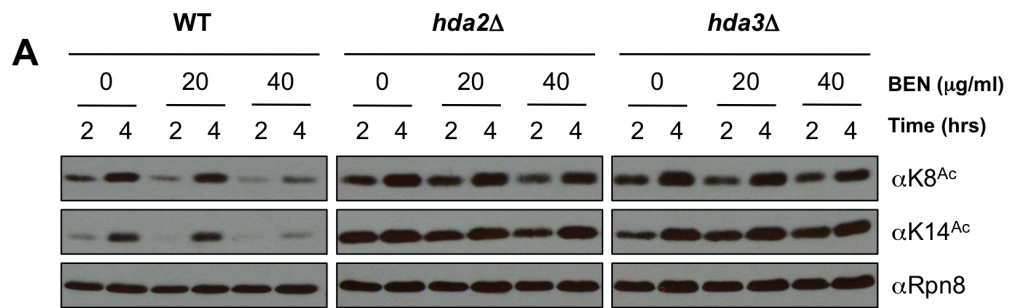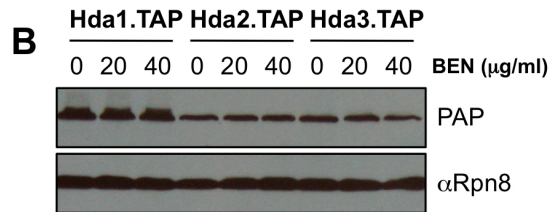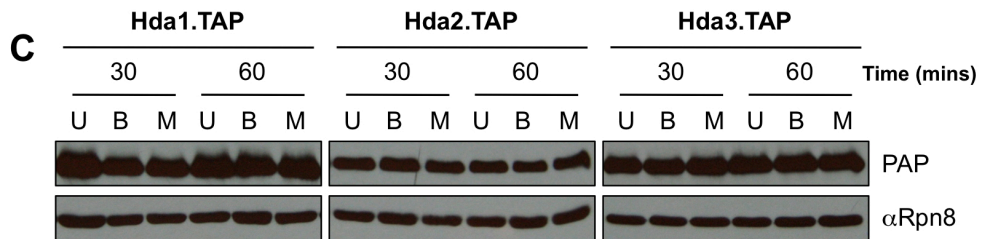



**Suppl Fig 8: Mehta *et al***

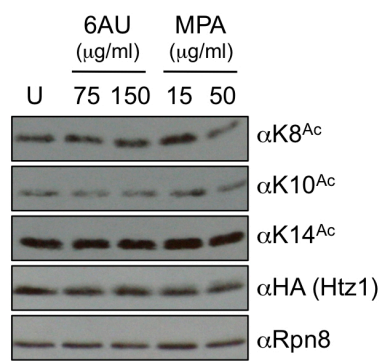

Supplement: supp_M110.185967_jbc.M110.185967-1.pdf [file supp_M110.185967_jbc.M110.185967-1.pdf]
